# Supplementary material for: Measures of Maximal Tactile Pressures during a Sustained Grasp Task Using a TactArray Device Have Satisfactory Reliability and Concurrent Validity in People with Stroke
Source: MDPI journal article supplement (doi:10.3390/s23063291), 2023-03-20
Supplement: s1 [file s1]

### Supplementary Tables

Table S1. Measures of reliability in the affected hand of participants with stroke without vision during complete grasp duration (8 s)

|                     |      | Session 1 | Session 2 | Session 3 | Mean 3 sessions |             | Change in mean (%) | 90% CI for change in mean | CV (%) | 90% CI for change in CV | Smallest effect (%)* | 90% CI for change in small-est effect | ICC  | 90% CI for change in ICC |
|---------------------|------|-----------|-----------|-----------|-----------------|-------------|--------------------|---------------------------|--------|-------------------------|----------------------|---------------------------------------|------|--------------------------|
| <i>Pressure/kPa</i> |      |           |           |           |                 |             |                    |                           |        |                         |                      |                                       |      |                          |
| Pres(8s)max         | Mean | 32.02     | 33.69     | 31.81     | 32.50           | Session 2-1 | 11.15              | -2.52, 26.73              | 18.50  | 13.37, 31.06            | 8.36                 | 2.98, 11.59                           | 0.88 | 0.68, 0.96               |
|                     | SD   | 14.64     | 10.82     | 12.01     | 12.59           | Session 3-2 | -7.08              | -17.18, 4.24              | 16.05  | 11.63, 26.75            | 7.06                 | 2.46, 9.78                            | 0.87 | 0.66, 0.95               |
| Pres(8s)avg2        | Mean | 30.05     | 31.10     | 29.85     | 30.34           | Session 2-1 | 8.10               | -5.52, 23.68              | 19.03  | 13.74, 31.99            | 9.63                 | 3.74, 13.29                           | 0.90 | 0.73, 0.97               |
|                     | SD   | 14.40     | 11.51     | 11.27     | 12.47           | Session 3-2 | -3.48              | -14.59, 9.08              | 17.15  | 12.41, 28.68            | 8.04                 | 2.97, 11.12                           | 0.89 | 0.69, 0.96               |
| Pres(8s)avg3        | Mean | 29.56     | 30.69     | 29.69     | 29.98           | Session 2-1 | 9.38               | -4.02, 24.65              | 18.42  | 13.31, 30.91            | 8.99                 | 3.41, 12.41                           | 0.89 | 0.71, 0.96               |
|                     | SD   | 13.97     | 10.46     | 10.88     | 11.87           | Session 3-2 | -3.66              | -13.36, 7.13              | 14.72  | 10.69, 24.46            | 7.55                 | 2.97, 10.37                           | 0.90 | 0.73, 0.97               |
| <i>Force/N</i>      |      |           |           |           |                 |             |                    |                           |        |                         |                      |                                       |      |                          |
| Force(8s)max        | Mean | 49.46     | 47.58     | 42.58     | 46.54           | Session 2-1 | 0.86               | -13.65, 17.81             | 22.26  | 16.01, 37.74            | 11.91                | 4.76, 16.44                           | 0.91 | 0.76, 0.97               |
|                     | SD   | 25.53     | 21.03     | 14.65     | 20.88           | Session 3-2 | -7.39              | -16.80, 3.08              | 14.87  | 10.79, 24.71            | 9.91                 | 4.34, 13.51                           | 0.94 | 0.83, 0.98               |
| Force(8s)avg 2      | Mean | 40.01     | 46.07     | 39.99     | 42.02           | Session 2-1 | 18.68              | 3.72, 35.79               | 19.04  | 13.75, 32.01            | 11.61                | 4.91, 15.92                           | 0.93 | 0.80, 0.98               |
|                     | SD   | 17.86     | 20.06     | 13.83     | 17.44           | Session 3-2 | -10.95             | -18.20, -3.05             | 11.62  | 8.46, 19.14             | 10.11                | 4.69, 13.69                           | 0.96 | 0.89, 0.99               |
| Force(8s)avg 3      | Mean | 42.21     | 45.08     | 38.85     | 42.04           | Session 2-1 | 11.31              | -4.45, 29.67              | 21.84  | 15.72, 36.98            | 11.69                | 4.68, 16.13                           | 0.91 | 0.76, 0.97               |
|                     | SD   | 20.22     | 19.51     | 13.02     | 17.88           | Session 3-2 | -10.91             | -19.41, -1.51             | 13.86  | 10.07, 22.96            | 9.81                 | 4.36, 13.34                           | 0.94 | 0.84, 0.98               |

\*:smallest effect from pure SD; CI: Confidence interval; CV: Coefficient of variation; SD: standard deviation

Table S2. Measures of reliability in the affected hand of participants with stroke with vision during the plateau phase (5 s)

|                     |      | Session<br>1 | Session<br>2 | Session<br>3 | Mean 3<br>sessions |                          | Change<br>in mean<br>(%) | 90% CI for<br>change in<br>mean | CV<br>(%) | 90% CI for<br>change in<br>CV | Smallest<br>effect (%)* | 90% CI for<br>change in<br>smallest effect | ICC  | 90% CI for<br>change in<br>ICC |
|---------------------|------|--------------|--------------|--------------|--------------------|--------------------------|--------------------------|---------------------------------|-----------|-------------------------------|-------------------------|--------------------------------------------|------|--------------------------------|
| <b>Pressure/kPa</b> |      |              |              |              |                    |                          |                          |                                 |           |                               |                         |                                            |      |                                |
| Pres(5s)max         | Mean | 39.33        | 41.26        | 41.00        | 40.53              | Session 2-1              | 4.35                     | -7.28, 17.43                    | 16.52     | 11.96, 27.57                  | 10.40                   | 4.46, 14.22                                | 0.93 | 0.81, 0.98                     |
|                     | SD   | 15.20        | 14.66        | 13.92        | 14.60              | Session 3-2              | 3.94                     | -14.38, 26.17                   | 28.51     | 20.37, 49.13                  | 7.87                    | -1.79, 11.48                               | 0.74 | 0.38, 0.90                     |
|                     |      |              |              |              |                    | Session 3-2 <sup>#</sup> | -5.68                    | -13.89, 3.31                    | 11.74     | 8.44, 20.04                   | 9.15                    | 4.17, 12.39                                | 0.95 | 0.86, 0.98                     |
| Pres(5s)avg2        | Mean | 35.17        | 39.64        | 37.13        | 37.31              | Session 2-1              | 11.92                    | -0.65, 26.07                    | 16.66     | 12.07, 27.83                  | 10.67                   | 4.60, 14.59                                | 0.93 | 0.82, 0.98                     |
|                     | SD   | 14.29        | 14.99        | 10.57        | 13.43              | Session 3-2              | 0.16                     | -17.61, 21.75                   | 28.74     | 20.53, 49.54                  | 7.61                    | -2.09, 11.17                               | 0.72 | 0.35, 0.90                     |
|                     |      |              |              |              |                    | Session 3-2 <sup>#</sup> | -9.48                    | -16.02, -2.42                   | 9.58      | 6.90, 16.25                   | 9.13                    | 4.31, 12.32                                | 0.97 | 0.90, 0.99                     |
| Pres(5s)avg3        | Mean | 36.07        | 38.27        | 37.87        | 37.40              | Session 2-1              | 6.19                     | -5.04, 18.76                    | 15.57     | 11.29, 25.92                  | 10.75                   | 4.74, 14.66                                | 0.94 | 0.84, 0.98                     |
|                     | SD   | 14.65        | 13.95        | 11.81        | 13.52              | Session 3-2              | 4.44                     | -13.93, 26.73                   | 28.44     | 20.32, 48.99                  | 7.76                    | -1.88, 11.33                               | 0.74 | 0.38, 0.90                     |
|                     |      |              |              |              |                    | Session 3-2 <sup>#</sup> | -5.45                    | -12.57, 2.25                    | 10.02     | 7.21, 17.01                   | 9.17                    | 4.30, 12.38                                | 0.97 | 0.89, 0.99                     |
| <b>Force/N</b>      |      |              |              |              |                    |                          |                          |                                 |           |                               |                         |                                            |      |                                |
| Force(5s)max        | Mean | 56.91        | 58.50        | 54.54        | 56.65              | Session 2-1              | 7.09                     | -4.28, 19.80                    | 15.63     | 11.33, 26.02                  | 12.78                   | 5.83, 17.40                                | 0.96 | 0.88, 0.99                     |
|                     | SD   | 28.76        | 23.66        | 15.01        | 23.18              | Session 3-2              | -0.31                    | -13.43, 14.79                   | 20.03     | 14.44, 33.75                  | 9.02                    | 3.21, 12.52                                | 0.88 | 0.68, 0.96                     |
| Force(5s)avg2       | Mean | 49.06        | 53.54        | 48.96        | 50.52              | Session 2-1              | 11.05                    | 0.85, 22.27                     | 13.27     | 9.64, 21.95                   | 14.50                   | 6.85, 19.68                                | 0.98 | 0.93, 0.99                     |
|                     | SD   | 24.13        | 24.33        | 15.88        | 21.81              | Session 3-2              | -0.32                    | -16.83, 19.47                   | 26.40     | 18.91, 45.25                  | 10.60                   | 3.33, 14.88                                | 0.86 | 0.62, 0.95                     |
| Force(5s)avg3       | Mean | 50.38        | 53.91        | 49.74        | 51.34              | Session 2-1              | 9.78                     | 0.19, 20.29                     | 12.56     | 9.14, 20.74                   | 13.70                   | 6.48, 18.57                                | 0.97 | 0.93, 0.99                     |
|                     | SD   | 25.20        | 23.47        | 15.11        | 21.71              | Session 3-2              | -0.11                    | -15.76, 18.44                   | 24.67     | 17.70, 42.08                  | 9.74                    | 2.97, 13.67                                | 0.85 | 0.61, 0.95                     |

<sup>#</sup>:outlier removed; \*:smallest effect from pure SD; CI: Confidence interval; CV: Coefficient of variation; SD: standard deviation

Table S3. Measures of reliability in the affected hand of participants with stroke without vision during the plateau phase (5 s)

|                     |      | Session<br>1 | Session<br>2 | Session<br>3 | Mean 3<br>sessions |             | Change in<br>mean (%) | 90% CI for<br>change in<br>mean | CV<br>(%) | 90% CI for<br>change in<br>CV | Smallest<br>effect (%)* | 90% CI for<br>change in small-<br>est effect | ICC  | 90% CI for<br>change in<br>ICC |
|---------------------|------|--------------|--------------|--------------|--------------------|-------------|-----------------------|---------------------------------|-----------|-------------------------------|-------------------------|----------------------------------------------|------|--------------------------------|
| <i>Pressure/kPa</i> |      |              |              |              |                    |             |                       |                                 |           |                               |                         |                                              |      |                                |
| Pres(5s)max         | Mean | 39.90        | 41.80        | 39.48        | 40.39              | Session 2-1 | 11.10                 | -2.86, 27.06                    | 18.97     | 13.70, 31.89                  | 8.89                    | 3.27, 12.30                                  | 0.89 | 0.69, 0.96                     |
|                     | SD   | 19.12        | 14.42        | 14.48        | 16.15              | Session 3-2 | -6.30                 | -16.61, 5.29                    | 16.29     | 11.80, 27.17                  | 7.27                    | 2.57, 10.07                                  | 0.87 | 0.67, 0.96                     |
| Pres(5s)avg2        | Mean | 36.65        | 38.32        | 36.90        | 37.29              | Session 2-1 | 9.65                  | -2.90, 23.83                    | 17.04     | 12.33, 28.48                  | 10.20                   | 4.30, 13.97                                  | 0.93 | 0.79, 0.97                     |
|                     | SD   | 18.72        | 14.93        | 12.70        | 15.65              | Session 3-2 | -1.43                 | -12.84, 11.46                   | 17.24     | 12.48, 28.85                  | 7.91                    | 2.86, 10.94                                  | 0.88 | 0.68, 0.96                     |
| Pres(5s)avg3        | Mean | 36.45        | 37.74        | 36.91        | 37.04              | Session 2-1 | 9.35                  | -4.42, 25.11                    | 19.03     | 13.74, 31.99                  | 9.35                    | 3.56, 12.91                                  | 0.89 | 0.72, 0.96                     |
|                     | SD   | 17.69        | 13.39        | 13.29        | 14.93              | Session 3-2 | -2.07                 | -11.61, 8.50                    | 14.18     | 10.30, 23.52                  | 7.76                    | 3.16, 10.63                                  | 0.91 | 0.76, 0.97                     |
| <i>Force/N</i>      |      |              |              |              |                    |             |                       |                                 |           |                               |                         |                                              |      |                                |
| Force(5s)max        | Mean | 61.56        | 59.60        | 53.46        | 58.21              | Session 2-1 | 1.92                  | -13.40, 19.94                   | 23.45     | 16.85, 39.88                  | 12.36                   | 4.90, 17.08                                  | 0.91 | 0.75, 0.97                     |
|                     | SD   | 33.38        | 27.52        | 19.11        | 27.30              | Session 3-2 | -6.97                 | -16.86, 4.09                    | 15.65     | 11.35, 26.07                  | 10.30                   | 4.48, 14.05                                  | 0.94 | 0.82, 0.98                     |
| Force(5s)avg2       | Mean | 50.78        | 57.35        | 50.23        | 52.78              | Session 2-1 | 16.06                 | 0.90, 33.49                     | 19.85     | 14.32, 33.44                  | 12.26                   | 5.21, 16.82                                  | 0.93 | 0.81, 0.98                     |
|                     | SD   | 23.67        | 26.69        | 18.42        | 23.18              | Session 3-2 | -9.48                 | -16.94, -1.36                   | 11.77     | 8.57, 19.39                   | 10.70                   | 4.99, 14.49                                  | 0.96 | 0.90, 0.99                     |
| Force(5s)avg3       | Mean | 52.58        | 56.00        | 48.81        | 52.46              | Session 2-1 | 11.14                 | -5.14, 30.22                    | 22.75     | 16.36, 38.62                  | 12.07                   | 4.80, 16.67                                  | 0.91 | 0.75, 0.97                     |
|                     | SD   | 26.02        | 25.36        | 16.92        | 23.14              | Session 3-2 | -9.60                 | -18.26, -0.03                   | 13.91     | 10.10, 23.06                  | 10.15                   | 4.55, 13.80                                  | 0.95 | 0.85, 0.98                     |

\*:smallest effect from pure SD; CI: Confidence interval; CV: Coefficient of variation; SD: standard deviation

Table S4. Measures of reliability in the less affected hand of participants with stroke without vision during complete grasp duration (8 s)

|                     |      | Ses-<br>sion 1 | Ses-<br>sion 2 | Ses-<br>sion 3 | Mean<br>3 ses-<br>sions |             | Change<br>in mean<br>(%) | 90% CI for<br>change in<br>mean | CV<br>(%) | 90% CI for<br>change in<br>CV | Smallest<br>effect<br>(%)* | 90% CI for<br>change in<br>smallest effect | ICC  | 90% CI for<br>change in ICC |
|---------------------|------|----------------|----------------|----------------|-------------------------|-------------|--------------------------|---------------------------------|-----------|-------------------------------|----------------------------|--------------------------------------------|------|-----------------------------|
| <i>Pressure/kPa</i> |      |                |                |                |                         |             |                          |                                 |           |                               |                            |                                            |      |                             |
| Pres(8s)max         | Mean | 36.44          | 37.25          | 35.10          | 36.26                   | Session 2-1 | 7.36                     | -3.03, 18.87                    | 14.08     | 10.23, 23.36                  | 10.37                      | 4.66, 14.11                                | 0.95 | 0.85, 0.98                  |
|                     | SD   | 17.37          | 13.49          | 8.99           | 13.71                   | Session 3-2 | -1.78                    | -12.48, 10.24                   | 16.11     | 11.67, 26.86                  | 7.20                       | 2.55, 9.98                                 | 0.87 | 0.67, 0.96                  |
| Pres(8s)avg2        | Mean | 34.49          | 36.07          | 32.09          | 34.22                   | Session 2-1 | 11.67                    | -0.57, 25.41                    | 16.21     | 11.74, 27.03                  | 10.82                      | 4.72, 14.77                                | 0.94 | 0.83, 0.98                  |
|                     | SD   | 17.68          | 13.16          | 9.79           | 13.93                   | Session 3-2 | -8.70                    | -15.79, -1.02                   | 11.02     | 8.03, 18.12                   | 8.25                       | 3.74, 11.18                                | 0.95 | 0.86, 0.98                  |
| Pres(8s)avg3        | Mean | 34.16          | 34.37          | 32.47          | 33.67                   | Session 2-1 | 6.94                     | -5.07, 20.48                    | 16.67     | 12.07, 27.84                  | 10.46                      | 4.48, 14.30                                | 0.93 | 0.81, 0.98                  |
|                     | SD   | 17.15          | 12.12          | 8.93           | 13.17                   | Session 3-2 | -2.38                    | -10.68, 6.69                    | 12.19     | 8.87, 20.11                   | 7.72                       | 3.34, 10.50                                | 0.93 | 0.81, 0.98                  |
| <i>Force/N</i>      |      |                |                |                |                         |             |                          |                                 |           |                               |                            |                                            |      |                             |
| Force(8s)max        | Mean | 46.39          | 50.16          | 44.49          | 47.01                   | Session 2-1 | 4.45                     | -7.46, 17.89                    | 16.96     | 12.28, 28.35                  | 10.25                      | 4.34, 14.04                                | 0.93 | 0.80, 0.97                  |
|                     | SD   | 17.93          | 25.30          | 13.57          | 19.54                   | Session 3-2 | -5.02                    | -17.35, 9.17                    | 19.73     | 14.23, 33.22                  | 9.02                       | 3.25, 12.50                                | 0.88 | 0.68, 0.96                  |
| Force(8s)avg2       | Mean | 42.79          | 47.82          | 40.85          | 43.82                   | Session 2-1 | 11.52                    | -2.13, 27.07                    | 18.40     | 13.30, 30.87                  | 11.23                      | 4.76, 15.39                                | 0.93 | 0.80, 0.98                  |
|                     | SD   | 20.28          | 24.68          | 12.71          | 19.85                   | Session 3-2 | -8.24                    | -20.54, 5.97                    | 20.47     | 14.75, 34.53                  | 9.20                       | 3.27, 12.78                                | 0.88 | 0.68, 0.96                  |
| Force(8s)avg3       | Mean | 42.78          | 45.25          | 40.86          | 42.96                   | Session 2-1 | 5.04                     | -5.96, 17.34                    | 15.40     | 11.16, 25.63                  | 10.56                      | 4.65, 14.40                                | 0.94 | 0.84, 0.98                  |
|                     | SD   | 18.64          | 21.47          | 12.33          | 17.89                   | Session 3-2 | -4.09                    | -15.62, 9.01                    | 18.02     | 13.03, 30.21                  | 8.86                       | 3.38, 12.22                                | 0.89 | 0.72, 0.96                  |

\*:smallest effect from pure SD; CI: Confidence interval; CV: Coefficient of variation; SD: standard deviation

Table S5. Measures of reliability in the less affected hand of participants with stroke with vision during the plateau phase (5 s)

|                     |      | Ses-<br>sion 1 | Ses-<br>sion 2 | Ses-<br>sion 3 | Mean 3<br>ses-<br>sions |             | Change in<br>mean (%) | 90% CI for<br>change in<br>mean | CV<br>(%) | 90% CI for<br>change in<br>CV | Smallest<br>effect<br>(%)* | 90% CI for<br>change in<br>smallest effect | ICC  | 90% CI for<br>change in<br>ICC |
|---------------------|------|----------------|----------------|----------------|-------------------------|-------------|-----------------------|---------------------------------|-----------|-------------------------------|----------------------------|--------------------------------------------|------|--------------------------------|
| <i>Pressure/kPa</i> |      |                |                |                |                         |             |                       |                                 |           |                               |                            |                                            |      |                                |
| Pres(5s)max         | Mean | 50.06          | 44.39          | 45.23          | 46.56                   | Session 2-1 | -8.96                 | -26.80, 13.24                   | 32.62     | 23.20, 56.79                  | 7.34                       | -3.13, 11.08                               | 0.66 | 0.24, 0.87                     |
|                     | SD   | 23.38          | 14.81          | 13.22          | 17.71                   | Session 3-2 | 4.34                  | -8.05, 18.40                    | 17.77     | 12.85, 29.77                  | 7.38                       | 2.40, 10.28                                | 0.86 | 0.63, 0.95                     |
| Pres(5s)avg2        | Mean | 48.56          | 42.92          | 42.64          | 44.70                   | Session 2-1 | -8.87                 | -27.71, 14.89                   | 34.95     | 24.80, 61.20                  | 7.17                       | -3.63, 11.03                               | 0.62 | 0.18, 0.85                     |
|                     | SD   | 23.12          | 14.65          | 12.58          | 17.39                   | Session 3-2 | 1.96                  | -9.51, 14.89                    | 16.70     | 12.09, 27.89                  | 7.33                       | 2.54, 10.17                                | 0.87 | 0.66, 0.95                     |
| Pres(5s)avg3        | Mean | 48.06          | 41.69          | 42.90          | 44.22                   | Session 2-1 | -10.51                | -27.98, 11.19                   | 32.44     | 23.08, 56.45                  | 7.27                       | -3.13, 10.98                               | 0.66 | 0.24, 0.87                     |
|                     | SD   | 22.90          | 13.76          | 12.89          | 17.12                   | Session 3-2 | 5.04                  | -6.30, 17.75                    | 15.92     | 11.54, 26.54                  | 7.38                       | 2.70, 10.20                                | 0.88 | 0.69, 0.96                     |
| <i>Force/N</i>      |      |                |                |                |                         |             |                       |                                 |           |                               |                            |                                            |      |                                |
| Force(5s)max        | Mean | 62.39          | 55.20          | 60.84          | 59.48                   | Session 2-1 | -11.95                | -25.58, 4.18                    | 24.32     | 17.45, 41.45                  | 7.77                       | 0.97, 11.11                                | 0.79 | 0.48, 0.92                     |
|                     | SD   | 22.45          | 19.99          | 17.67          | 20.13                   | Session 3-2 | 13.40                 | 1.28, 26.97                     | 15.75     | 11.41, 26.24                  | 7.73                       | 2.95, 10.64                                | 0.89 | 0.71, 0.96                     |
| Force(5s)avg2       | Mean | 57.13          | 50.33          | 56.72          | 54.73                   | Session 2-1 | -13.17                | -26.94, 3.20                    | 25.04     | 17.96, 42.76                  | 7.75                       | 0.32, 11.12                                | 0.78 | 0.46, 0.92                     |
|                     | SD   | 20.95          | 19.78          | 18.16          | 19.66                   | Session 3-2 | 15.79                 | 3.89-29.06                      | 15.07     | 10.93, 25.05                  | 8.24                       | 3.35, 11.29                                | 0.91 | 0.76, 0.97                     |
| Force(5s)avg3       | Mean | 57.06          | 50.59          | 56.51          | 54.72                   | Session 2-1 | -11.18                | -25.20, 5.46                    | 24.88     | 17.85, 42.47                  | 7.85                       | 0.82, 11.25                                | 0.78 | 0.47, 0.92                     |
|                     | SD   | 21.30          | 18.49          | 17.83          | 19.27                   | Session 3-2 | 14.14                 | 3.26, 26.16                     | 13.84     | 10.05, 22.93                  | 7.96                       | 3.32, 10.88                                | 0.92 | 0.78, 0.97                     |

\*:smallest effect from pure SD; CI: Confidence interval; CV: Coefficient of variation; SD: standard deviation

Table S6. Measures of reliability in the less affected hand of participants with stroke without vision during the plateau phase (5 s)

|                     |      | Ses-<br>sion 1 | Ses-<br>sion 2 | Ses-<br>sion 3 | Mean 3<br>ses-<br>sions |             | Change in<br>mean (%) | 90% CI for<br>change in<br>mean | CV<br>(%) | 90% CI for<br>change in<br>CV | Smallest<br>effect (%)* | 90% CI for<br>change in small-<br>est effect | ICC  | 90% CI for<br>change in ICC |
|---------------------|------|----------------|----------------|----------------|-------------------------|-------------|-----------------------|---------------------------------|-----------|-------------------------------|-------------------------|----------------------------------------------|------|-----------------------------|
| <i>Pressure/kPa</i> |      |                |                |                |                         |             |                       |                                 |           |                               |                         |                                              |      |                             |
| Pres(5s)max         | Mean | 44.72          | 45.41          | 43.46          | 44.53                   | Session 2-1 | 7.16                  | -3.69, 19.24                    | 14.82     | 10.75, 24.63                  | 10.67                   | 4.76, 14.53                                  | 0.95 | 0.85, 0.98                  |
|                     | SD   | 21.18          | 16.38          | 11.23          | 16.76                   | Session 3-2 | -0.15                 | -10.99, 12.01                   | 16.03     | 11.62, 26.73                  | 7.28                    | 2.62, 10.08                                  | 0.88 | 0.68, 0.96                  |
| Pres(5s)avg2        | Mean | 41.86          | 42.78          | 39.81          | 41.48                   | Session 2-1 | 7.63                  | -3.27, 19.75                    | 14.81     | 10.75, 24.61                  | 10.89                   | 4.88, 14.82                                  | 0.95 | 0.85, 0.98                  |
|                     | SD   | 20.98          | 15.94          | 12.07          | 16.73                   | Session 3-2 | -3.80                 | -12.59, 5.86                    | 13.19     | 9.59, 21.82                   | 8.41                    | 3.65, 11.46                                  | 0.93 | 0.81, 0.98                  |
| Pres(5s)avg3        | Mean | 41.56          | 41.52          | 40.15          | 41.08                   | Session 2-1 | 6.10                  | -5.42, 19.01                    | 16.03     | 11.61, 26.72                  | 10.52                   | 4.57, 14.36                                  | 0.94 | 0.82, 0.98                  |
|                     | SD   | 20.57          | 14.64          | 11.07          | 15.92                   | Session 3-2 | 0.00                  | -8.43, 9.20                     | 12.06     | 8.78, 19.89                   | 7.72                    | 3.36, 10.50                                  | 0.93 | 0.81, 0.98                  |
| <i>Force/N</i>      |      |                |                |                |                         |             |                       |                                 |           |                               |                         |                                              |      |                             |
| Force(5s)max        | Mean | 56.69          | 60.92          | 54.89          | 57.50                   | Session 2-1 | 3.95                  | -8.40, 17.97                    | 17.78     | 12.86, 29.79                  | 10.34                   | 4.30, 14.18                                  | 0.92 | 0.78, 0.97                  |
|                     | SD   | 22.45          | 30.86          | 17.31          | 24.19                   | Session 3-2 | -3.50                 | -15.99, 10.85                   | 19.64     | 14.17, 33.07                  | 9.09                    | 3.31, 12.60                                  | 0.88 | 0.69, 0.96                  |
| Force(5s)avg2       | Mean | 52.36          | 56.70          | 51.11          | 53.39                   | Session 2-1 | 6.98                  | -7.25, 23.39                    | 20.28     | 14.62, 34.20                  | 11.45                   | 4.70, 15.75                                  | 0.92 | 0.77, 0.97                  |
|                     | SD   | 24.70          | 30.51          | 15.35          | 24.33                   | Session 3-2 | -1.47                 | -15.47, 14.84                   | 21.93     | 15.78, 37.15                  | 9.19                    | 3.03, 12.83                                  | 0.86 | 0.64, 0.95                  |
| Force(5s)avg3       | Mean | 52.19          | 54.87          | 50.60          | 52.56                   | Session 2-1 | 4.23                  | -7.17, 17.04                    | 16.18     | 11.72, 26.98                  | 10.55                   | 4.58, 14.41                                  | 0.94 | 0.82, 0.98                  |
|                     | SD   | 22.79          | 26.42          | 15.65          | 22.08                   | Session 3-2 | -1.98                 | -13.71, 11.35                   | 17.93     | 12.97, 30.06                  | 8.90                    | 3.42, 12.28                                  | 0.90 | 0.72, 0.96                  |

\*:smallest effect from pure SD; CI: Confidence interval; CV: Coefficient of variation; SD: standard deviation
